# Supplementary material for: An informatics consult approach for generating clinical evidence for treatment decisions
Source: Springer Nature journal article supplement (doi:10.1186/s12911-021-01638-z), 2021-10-12
Supplement: 12911_2021_1638_MOESM1_ESM.pdf [file 12911_2021_1638_MOESM1_ESM.pdf]

Additional file 1: Comparison of the Informatics Consult with traditional approaches to evidence generation.

| Areas                                                                                           | Traditional methods of evidence generation                                                                                                                                                       | Informatics Consult                                                                                                                                                                                                                                   |
|-------------------------------------------------------------------------------------------------|--------------------------------------------------------------------------------------------------------------------------------------------------------------------------------------------------|-------------------------------------------------------------------------------------------------------------------------------------------------------------------------------------------------------------------------------------------------------|
| <b>Who initiates the question?</b>                                                              | Top down: typically driven by a small number of researchers                                                                                                                                      | Bottom up: democratic, any clinician, any uncertainty and potentially patient driven                                                                                                                                                                  |
| <b>Simultaneous delivery of all relevant evidence</b>                                           | Not often possible, one study and one design at a time                                                                                                                                           | Yes                                                                                                                                                                                                                                                   |
| <b>Embedded in health systems (the question or the answer or the means of providing answer)</b> | No                                                                                                                                                                                               | Yes                                                                                                                                                                                                                                                   |
| <b>Clinical trial prioritisation, informing trial design and recruitment</b>                    | Top down: driven by specific groups of individuals                                                                                                                                               | Bottom up: opportunities for embedding within clinical practice                                                                                                                                                                                       |
| <b>Involvement of individuals</b>                                                               | Researcher centric                                                                                                                                                                               | Patient and clinician centric                                                                                                                                                                                                                         |
| <b>Strength of evidence and levels of evidence</b>                                              | Levels of evidence classified in all major clinical guidelines; however, these are all based on peer reviewed published evidence                                                                 | Same levels of evidence apply; however, the framework aims to return evidence within clinical timescales to mitigate hurdles in the journal peer-review process. Potential for collating information from past Consults in an open-access repository. |
| <b>Clinical guideline recommendations based on evidence</b>                                     | Yes, information from randomised trials and peer-reviewed publications are included in clinical guidelines                                                                                       | Raises important questions on what basis might clinicians follow the Consult before it is peer reviewed and published                                                                                                                                 |
| <b>Regulatory approvals on the labels of drugs and medical devices</b>                          | Food and Drug Administration (FDA), European Medicines Agency and Medicines and Healthcare products Regulatory Agency established processes for trials and for the Real-world Evidence framework | Largely untested                                                                                                                                                                                                                                      |

**Additional file 2: Specification and emulation of a target trial of warfarin therapy and mortality or stroke risk using**

| Protocol component          | Target trial specification                                                                                                                                                                                                             | Target trial emulation                                                                                         |
|-----------------------------|----------------------------------------------------------------------------------------------------------------------------------------------------------------------------------------------------------------------------------------|----------------------------------------------------------------------------------------------------------------|
| <b>Eligibility criteria</b> | Age $\geq$ 30 between 1 January 1998 and 27 June 2016                                                                                                                                                                                  | Same as for the target trial                                                                                   |
|                             | Age $\leq$ 85 at baseline                                                                                                                                                                                                              |                                                                                                                |
|                             | No history of stroke at baseline                                                                                                                                                                                                       |                                                                                                                |
|                             | At least 1 year of up-to-standard data in a CPRD practice                                                                                                                                                                              |                                                                                                                |
|                             | At least 1 year of potential follow-up from baseline                                                                                                                                                                                   |                                                                                                                |
|                             | Baseline is defined as the latest date by which an individual is diagnosed with cirrhosis or atrial fibrillation + 3 months (individuals must have both conditions at baseline), given that all eligibility criteria are met.          |                                                                                                                |
| <b>Treatment strategies</b> | Initiation of warfarin therapy versus no initiation of warfarin at baseline                                                                                                                                                            | Same as for the target trial. Date of medication initiation is defined as the first date of a prescription.    |
| <b>Treatment assignment</b> | Individuals are randomly assigned to a strategy at baseline                                                                                                                                                                            | Randomisation is emulated by adjusting for baseline confounders.                                               |
| <b>Outcomes</b>             | All-cause mortality and incident ischaemic stroke.                                                                                                                                                                                     | Same as for the target trial                                                                                   |
| <b>Follow-up</b>            | Starts at baseline and ends at the time of reaching an outcome, death, loss to follow-up (transfer out of the practice) or administrative end of follow-up (end of practice data collection or 27 June 2016), whichever happens first. | Same as for the target trial                                                                                   |
| <b>Causal contrast</b>      | Intention-to-treat effect                                                                                                                                                                                                              | Observational analog for the intention-to-treat effect                                                         |
| <b>Statistical analyses</b> | Intention-to-treat analysis                                                                                                                                                                                                            | Same as for the target trial, adjusting for baseline covariates via propensity score or regression adjustment. |
|                             | Subgroup analyses by age ( $< 65$ or $\geq 65$ ), sex, normal INR ( $< 1.7$ ).                                                                                                                                                         | Same subgroup analyses.                                                                                        |

**Additional file 3: Baseline characteristics of the unmatched and matched cohorts**

| Characteristics                               | Unmatched cohort |               |                         | Matched cohort |               |                         |
|-----------------------------------------------|------------------|---------------|-------------------------|----------------|---------------|-------------------------|
|                                               | No warfarin      | Warfarin      | Standardised difference | No warfarin    | Warfarin      | Standardised difference |
| <b>N</b>                                      | 579              | 443           |                         | 526            | 235           |                         |
| <b>Gender, women (%)</b>                      | 199 (34.4)       | 180 (40.6)    | 0.13                    | 193 (36.7)     | 95 (40.4)     | 0.077                   |
| <b>Age at baseline, years (mean (SD))</b>     | 65.66 (12.50)    | 61.69 (13.42) | 0.306                   | 65.16 (12.56)  | 61.11 (13.89) | 0.306                   |
| <b>Type 2 diabetes (%)</b>                    | 136 (23.5)       | 99 (22.3)     | 0.027                   | 125 (23.8)     | 46 (19.6)     | 0.102                   |
| <b>Hypertension (%)</b>                       | 258 (44.6)       | 183 (41.3)    | 0.066                   | 220 (41.8)     | 80 (34.0)     | 0.161                   |
| <b>Ascites (%)</b>                            | 143 (24.7)       | 125 (28.2)    | 0.08                    | 130 (24.7)     | 67 (28.5)     | 0.086                   |
| <b>Hepatic encephalopathy (%)</b>             | 29 (5.0)         | 32 (7.2)      | 0.093                   | 26 (4.9)       | 14 (6.0)      | 0.045                   |
| <b>Renal disease (%)</b>                      | 78 (13.5)        | 58 (13.1)     | 0.011                   | 62 (11.8)      | 21 (8.9)      | 0.094                   |
| <b>Steatosis (%)</b>                          | 63 (10.9)        | 48 (10.8)     | 0.001                   | 56 (10.6)      | 27 (11.5)     | 0.027                   |
| <b>Lipid regulating drugs (%)</b>             | 160 (27.6)       | 130 (29.3)    | 0.038                   | 144 (27.4)     | 58 (24.7)     | 0.061                   |
| <b>Hypertension treatment (%)</b>             | 236 (40.8)       | 194 (43.8)    | 0.061                   | 216 (41.1)     | 94 (40.0)     | 0.022                   |
| <b>Digoxin (%)</b>                            | 107 (18.5)       | 65 (14.7)     | 0.103                   | 95 (18.1)      | 27 (11.5)     | 0.186                   |
| <b>Varices (%)</b>                            | 95 (16.4)        | 74 (16.7)     | 0.008                   | 81 (15.4)      | 33 (14.0)     | 0.038                   |
| <b>Bilirubin ≥ 34.2 µmol/L (%)</b>            | 130 (22.5)       | 93 (21.0)     | 0.035                   | 110 (20.9)     | 42 (17.9)     | 0.077                   |
| <b>Albumin &lt; 35 g/L (%)</b>                | 18 (3.1)         | 21 (4.7)      | 0.084                   | 17 (3.2)       | 12 (5.1)      | 0.094                   |
| <b>INR ≥ 1.7 (%)</b>                          | 11 (1.9)         | 217 (49.0)    | 1.285                   | 11 (2.1)       | 12 (5.1)      | 0.162                   |
| <b>Alanine aminotransferase ≥ 35 U/L (%)</b>  | 246 (42.5)       | 179 (40.4)    | 0.042                   | 211 (40.1)     | 84 (35.7)     | 0.09                    |
| <b>Aspartate transaminase ≥ 40 U/L (%)</b>    | 119 (20.6)       | 88 (19.9)     | 0.017                   | 104 (19.8)     | 38 (16.2)     | 0.094                   |
| <b>BMI ≥ 30 kg/m2 (%)</b>                     | 227 (39.2)       | 169 (38.1)    | 0.022                   | 208 (39.5)     | 81 (34.5)     | 0.105                   |
| <b>Gamma-glutamyltransferase ≥ 48 U/L (%)</b> | 263 (45.4)       | 183 (41.3)    | 0.083                   | 223 (42.4)     | 71 (30.2)     | 0.255                   |
| <b>Alkaline phosphatase ≥ 140 U/L (%)</b>     | 257 (44.4)       | 225 (50.8)    | 0.128                   | 236 (44.9)     | 104 (44.3)    | 0.012                   |
| <b>Platelet ≤ 150 10<sup>9</sup>/L (%)</b>    | 67 (11.6)        | 45 (10.2)     | 0.045                   | 58 (11.0)      | 24 (10.2)     | 0.026                   |
| <b>Creatinine &gt; 120 µmol/L (%)</b>         | 94 (16.2)        | 66 (14.9)     | 0.037                   | 76 (14.4)      | 25 (10.6)     | 0.115                   |

Blood test measurements are indicated as the presence or absence of a particular measurement above or below the stated threshold.

Additional file 4. Subgroup analyses showing Kaplan-Meier plots of the propensity-matched cohort for all-cause mortality. Flow diagram depicts analysis design. P values from logrank tests were indicated. Hazard ratios from Cox proportional hazards regression analyses were indicated. Numbers in parentheses indicate the 95% confidence intervals.

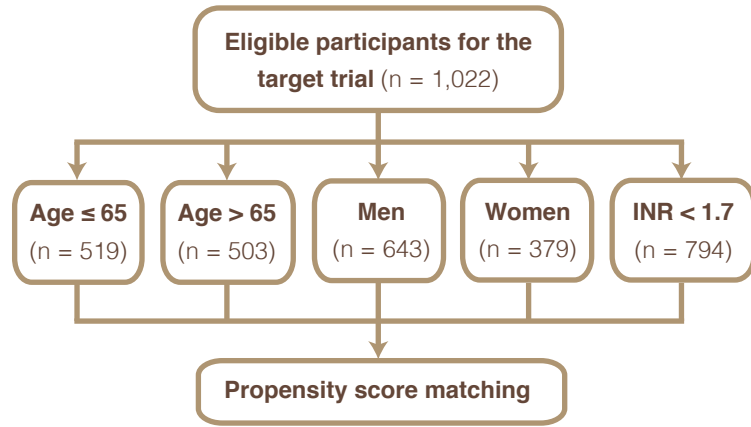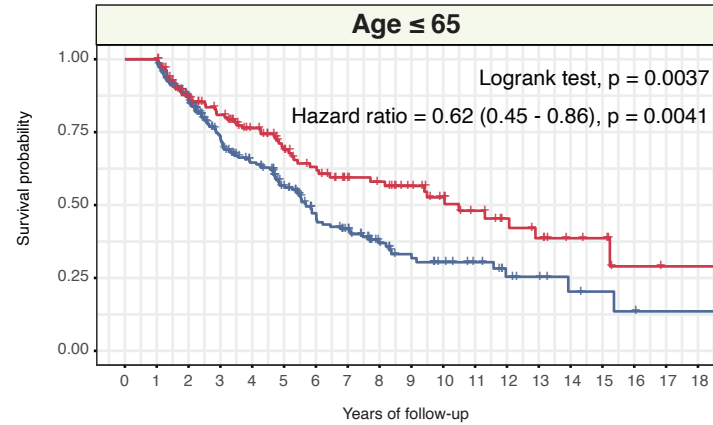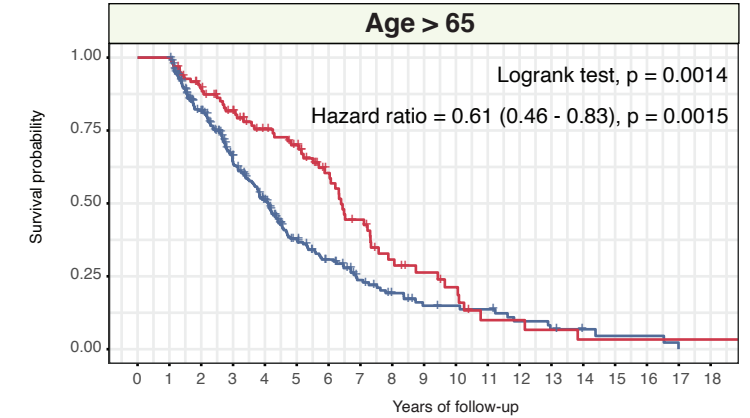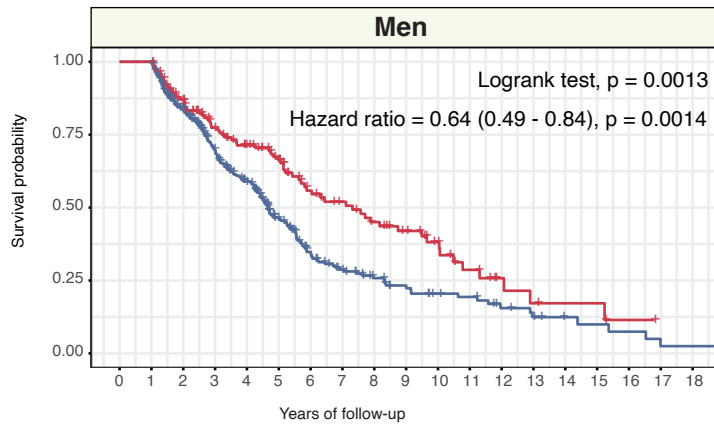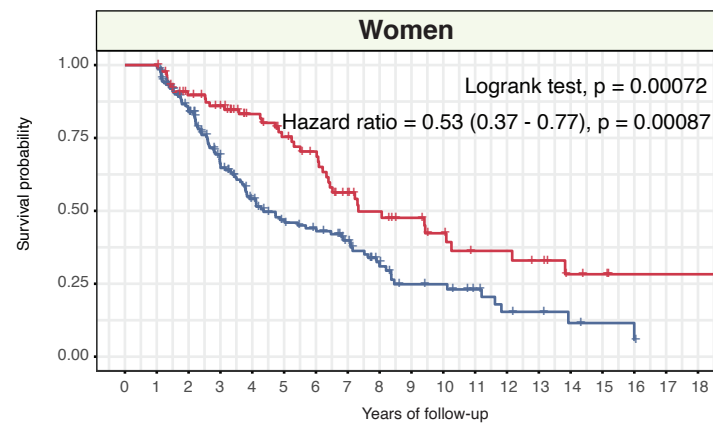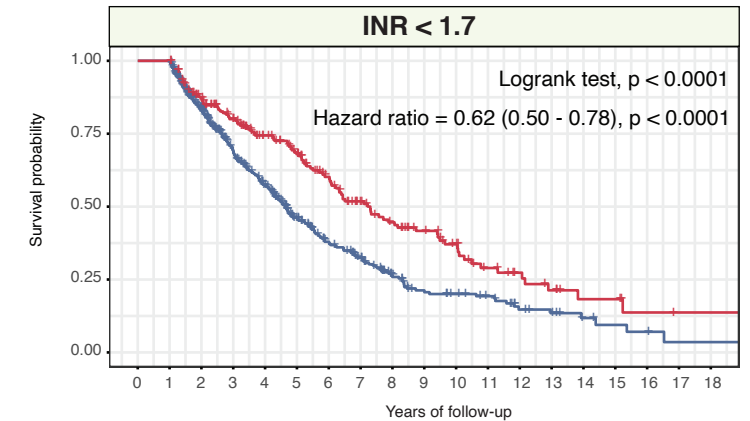

**Additional file 5: Baseline characteristics of the unmatched and matched cohorts in individuals aged ≤ 65**

| Characteristics                               | Unmatched cohort |              |                         | Matched cohort |              |                         |
|-----------------------------------------------|------------------|--------------|-------------------------|----------------|--------------|-------------------------|
|                                               | No warfarin      | Warfarin     | Standardised difference | No warfarin    | Warfarin     | Standardised difference |
| <b>N</b>                                      | 263              | 256          |                         | 239            | 136          |                         |
| <b>Gender, women (%)</b>                      | 65 (24.7)        | 86 (33.6)    | 0.196                   | 63 (26.4)      | 44 (32.4)    | 0.132                   |
| <b>Age at baseline, years (mean (SD))</b>     | 54.64 (8.03)     | 52.35 (8.71) | 0.273                   | 54.25 (8.08)   | 52.04 (8.83) | 0.262                   |
| <b>Type 2 diabetes (%)</b>                    | 48 (18.3)        | 47 (18.4)    | 0.003                   | 43 (18.0)      | 24 (17.6)    | 0.009                   |
| <b>Hypertension (%)</b>                       | 87 (33.1)        | 71 (27.7)    | 0.116                   | 78 (32.6)      | 35 (25.7)    | 0.152                   |
| <b>Ascites (%)</b>                            | 76 (28.9)        | 90 (35.2)    | 0.134                   | 64 (26.8)      | 45 (33.1)    | 0.138                   |
| <b>Hepatic encephalopathy (%)</b>             | 19 (7.2)         | 26 (10.2)    | 0.104                   | 17 (7.1)       | 10 (7.4)     | 0.009                   |
| <b>Renal disease (%)</b>                      | 37 (14.1)        | 31 (12.1)    | 0.058                   | 26 (10.9)      | 10 (7.4)     | 0.123                   |
| <b>Steatosis (%)</b>                          | 36 (13.7)        | 32 (12.5)    | 0.035                   | 32 (13.4)      | 19 (14.0)    | 0.017                   |
| <b>Lipid regulating drugs (%)</b>             | 59 (22.4)        | 57 (22.3)    | 0.004                   | 56 (23.4)      | 30 (22.1)    | 0.033                   |
| <b>Hypertension treatment (%)</b>             | 87 (33.1)        | 85 (33.2)    | 0.003                   | 80 (33.5)      | 42 (30.9)    | 0.055                   |
| <b>Digoxin (%)</b>                            | 37 (14.1)        | 22 (8.6)     | 0.173                   | 28 (11.7)      | 10 (7.4)     | 0.149                   |
| <b>Varices (%)</b>                            | 46 (17.5)        | 46 (18.0)    | 0.013                   | 36 (15.1)      | 21 (15.4)    | 0.011                   |
| <b>Bilirubin ≥ 34.2 µmol/L (%)</b>            | 77 (29.3)        | 61 (23.8)    | 0.124                   | 62 (25.9)      | 29 (21.3)    | 0.109                   |
| <b>Albumin &lt; 35 g/L (%)</b>                | 10 (3.8)         | 15 (5.9)     | 0.096                   | 9 (3.8)        | 9 (6.6)      | 0.129                   |
| <b>INR ≥ 1.7 (%)</b>                          | 7 (2.7)          | 123 (48.0)   | 1.223                   | 7 (2.9)        | 8 (5.9)      | 0.144                   |
| <b>Alanine aminotransferase ≥ 35 U/L (%)</b>  | 125 (47.5)       | 103 (40.2)   | 0.147                   | 108 (45.2)     | 51 (37.5)    | 0.157                   |
| <b>Aspartate transaminase ≥ 40 U/L (%)</b>    | 65 (24.7)        | 58 (22.7)    | 0.048                   | 58 (24.3)      | 25 (18.4)    | 0.144                   |
| <b>BMI ≥ 30 kg/m<sup>2</sup> (%)</b>          | 94 (35.7)        | 83 (32.4)    | 0.07                    | 81 (33.9)      | 39 (28.7)    | 0.113                   |
| <b>Gamma-glutamyltransferase ≥ 48 U/L (%)</b> | 142 (54.0)       | 100 (39.1)   | 0.303                   | 119 (49.8)     | 40 (29.4)    | 0.426                   |
| <b>Alkaline phosphatase ≥ 140 U/L (%)</b>     | 116 (44.1)       | 126 (49.2)   | 0.103                   | 104 (43.5)     | 57 (41.9)    | 0.032                   |
| <b>Platelet ≤ 150 10<sup>9</sup>/L (%)</b>    | 28 (10.6)        | 28 (10.9)    | 0.009                   | 24 (10.0)      | 13 (9.6)     | 0.016                   |
| <b>Creatinine &gt; 120 µmol/L (%)</b>         | 24 (9.1)         | 27 (10.5)    | 0.048                   | 18 (7.5)       | 10 (7.4)     | 0.007                   |

Blood test measurements are indicated as the presence or absence of a particular measurement above or below the stated threshold.

**Additional file 6: Baseline characteristics of the unmatched and matched cohorts in individuals aged > 65**

| Characteristics                               | Unmatched cohort |              |                         | Matched cohort |              |                         |
|-----------------------------------------------|------------------|--------------|-------------------------|----------------|--------------|-------------------------|
|                                               | No warfarin      | Warfarin     | Standardised difference | No warfarin    | Warfarin     | Standardised difference |
| <b>N</b>                                      | 316              | 187          |                         | 266            | 97           |                         |
| <b>Gender, women (%)</b>                      | 134 (42.4)       | 94 (50.3)    | 0.158                   | 117 (44.0)     | 45 (46.4)    | 0.048                   |
| <b>Age at baseline, years (mean (SD))</b>     | 74.83 (6.89)     | 74.47 (6.33) | 0.055                   | 74.45 (6.82)   | 74.26 (6.32) | 0.030                   |
| <b>Type 2 diabetes (%)</b>                    | 88 (27.8)        | 52 (27.8)    | 0.001                   | 67 (25.2)      | 23 (23.7)    | 0.034                   |
| <b>Hypertension (%)</b>                       | 171 (54.1)       | 112 (59.9)   | 0.117                   | 134 (50.4)     | 43 (44.3)    | 0.121                   |
| <b>Ascites (%)</b>                            | 67 (21.2)        | 35 (18.7)    | 0.062                   | 55 (20.7)      | 21 (21.6)    | 0.024                   |
| <b>Hepatic encephalopathy (%)</b>             | 10 (3.2)         | 6 (3.2)      | 0.003                   | 9 (3.4)        | 4 (4.1)      | 0.039                   |
| <b>Renal disease (%)</b>                      | 41 (13.0)        | 27 (14.4)    | 0.043                   | 29 (10.9)      | 12 (12.4)    | 0.046                   |
| <b>Steatosis (%)</b>                          | 27 (8.5)         | 16 (8.6)     | <0.001                  | 24 (9.0)       | 8 (8.2)      | 0.028                   |
| <b>Lipid regulating drugs (%)</b>             | 101 (32.0)       | 73 (39.0)    | 0.148                   | 82 (30.8)      | 31 (32.0)    | 0.024                   |
| <b>Hypertension treatment (%)</b>             | 149 (47.2)       | 109 (58.3)   | 0.224                   | 127 (47.7)     | 52 (53.6)    | 0.117                   |
| <b>Digoxin (%)</b>                            | 70 (22.2)        | 43 (23.0)    | 0.020                   | 47 (17.7)      | 16 (16.5)    | 0.031                   |
| <b>Varices (%)</b>                            | 49 (15.5)        | 28 (15.0)    | 0.015                   | 40 (15.0)      | 14 (14.4)    | 0.017                   |
| <b>Bilirubin ≥ 34.2 µmol/L (%)</b>            | 53 (16.8)        | 32 (17.1)    | 0.009                   | 44 (16.5)      | 12 (12.4)    | 0.119                   |
| <b>Albumin &lt; 35 g/L (%)</b>                | 8 (2.5)          | 6 (3.2)      | 0.041                   | 7 (2.6)        | 4 (4.1)      | 0.083                   |
| <b>INR ≥ 1.7 (%)</b>                          | 4 (1.3)          | 94 (50.3)    | 1.353                   | 4 (1.5)        | 4 (4.1)      | 0.159                   |
| <b>Alanine aminotransferase ≥ 35 U/L (%)</b>  | 121 (38.3)       | 76 (40.6)    | 0.048                   | 91 (34.2)      | 31 (32.0)    | 0.048                   |
| <b>Aspartate transaminase ≥ 40 U/L (%)</b>    | 54 (17.1)        | 30 (16.0)    | 0.028                   | 45 (16.9)      | 13 (13.4)    | 0.098                   |
| <b>BMI ≥ 30 kg/m<sup>2</sup> (%)</b>          | 133 (42.1)       | 86 (46.0)    | 0.08                    | 116 (43.6)     | 43 (44.3)    | 0.015                   |
| <b>Gamma-glutamyltransferase ≥ 48 U/L (%)</b> | 121 (38.3)       | 83 (44.4)    | 0.124                   | 94 (35.3)      | 31 (32.0)    | 0.072                   |
| <b>Alkaline phosphatase ≥ 140 U/L (%)</b>     | 141 (44.6)       | 99 (52.9)    | 0.167                   | 117 (44.0)     | 43 (44.3)    | 0.007                   |
| <b>Platelet ≤ 150 10<sup>9</sup>/L (%)</b>    | 39 (12.3)        | 17 (9.1)     | 0.105                   | 31 (11.7)      | 10 (10.3)    | 0.043                   |
| <b>Creatinine &gt; 120 µmol/L (%)</b>         | 70 (22.2)        | 39 (20.9)    | 0.032                   | 45 (16.9)      | 14 (14.4)    | 0.068                   |

Blood test measurements are indicated as the presence or absence of a particular measurement above or below the stated threshold.

**Additional file 7: Baseline characteristics of the unmatched and matched cohorts in men**

| Characteristics                                                       | Unmatched cohort |               |                         | Matched cohort |               |                         |
|-----------------------------------------------------------------------|------------------|---------------|-------------------------|----------------|---------------|-------------------------|
|                                                                       | No warfarin      | Warfarin      | Standardised difference | No warfarin    | Warfarin      | Standardised difference |
| <b>N</b>                                                              | 380              | 263           |                         | 333            | 142           |                         |
| <b>Age at baseline, years (mean (SD))</b>                             | 63.63 (12.36)    | 60.04 (12.44) | 0.290                   | 62.82 (12.62)  | 59.53 (13.14) | 0.255                   |
| <b>Type 2 diabetes (%)</b>                                            | 93 (24.5)        | 58 (22.1)     | 0.057                   | 75 (22.5)      | 26 (18.3)     | 0.105                   |
| <b>Hypertension (%)</b>                                               | 155 (40.8)       | 106 (40.3)    | 0.010                   | 130 (39.0)     | 49 (34.5)     | 0.094                   |
| <b>Ascites (%)</b>                                                    | 102 (26.8)       | 80 (30.4)     | 0.079                   | 92 (27.6)      | 45 (31.7)     | 0.089                   |
| <b>Hepatic encephalopathy (%)</b>                                     | 23 (6.1)         | 22 (8.4)      | 0.089                   | 19 (5.7)       | 11 (7.7)      | 0.082                   |
| <b>Renal disease (%)</b>                                              | 50 (13.2)        | 34 (12.9)     | 0.007                   | 42 (12.6)      | 15 (10.6)     | 0.064                   |
| <b>Steatosis (%)</b>                                                  | 36 (9.5)         | 26 (9.9)      | 0.014                   | 33 (9.9)       | 12 (8.5)      | 0.051                   |
| <b>Lipid regulating drugs (%)</b>                                     | 95 (25.0)        | 76 (28.9)     | 0.088                   | 85 (25.5)      | 33 (23.2)     | 0.053                   |
| <b>Hypertension treatment (%)</b>                                     | 155 (40.8)       | 121 (46.0)    | 0.105                   | 140 (42.0)     | 61 (43.0)     | 0.019                   |
| <b>Digoxin (%)</b>                                                    | 66 (17.4)        | 37 (14.1)     | 0.091                   | 55 (16.5)      | 19 (13.4)     | 0.088                   |
| <b>Varices (%)</b>                                                    | 68 (17.9)        | 44 (16.7)     | 0.031                   | 45 (13.5)      | 18 (12.7)     | 0.025                   |
| <b>Bilirubin <math>\geq 34.2 \mu\text{mol/L}</math> (%)</b>           | 89 (23.4)        | 55 (20.9)     | 0.060                   | 71 (21.3)      | 31 (21.8)     | 0.012                   |
| <b>Albumin <math>&lt; 35 \text{ g/L}</math> (%)</b>                   | 13 (3.4)         | 15 (5.7)      | 0.110                   | 11 (3.3)       | 8 (5.6)       | 0.113                   |
| <b>INR <math>\geq 1.7</math> (%)</b>                                  | 8 (2.1)          | 128 (48.7)    | 1.266                   | 8 (2.4)        | 9 (6.3)       | 0.193                   |
| <b>Alanine aminotransferase <math>\geq 35 \text{ U/L}</math> (%)</b>  | 159 (41.8)       | 102 (38.8)    | 0.062                   | 135 (40.5)     | 50 (35.2)     | 0.110                   |
| <b>Aspartate transaminase <math>\geq 40 \text{ U/L}</math> (%)</b>    | 78 (20.5)        | 53 (20.2)     | 0.009                   | 68 (20.4)      | 24 (16.9)     | 0.090                   |
| <b>BMI <math>\geq 30 \text{ kg/m}^2</math> (%)</b>                    | 142 (37.4)       | 102 (38.8)    | 0.03                    | 117 (35.1)     | 48 (33.8)     | 0.028                   |
| <b>Gamma-glutamyltransferase <math>\geq 48 \text{ U/L}</math> (%)</b> | 188 (49.5)       | 110 (41.8)    | 0.154                   | 152 (45.6)     | 47 (33.1)     | 0.259                   |
| <b>Alkaline phosphatase <math>\geq 140 \text{ U/L}</math> (%)</b>     | 150 (39.5)       | 123 (46.8)    | 0.148                   | 135 (40.5)     | 62 (43.7)     | 0.063                   |
| <b>Platelet <math>\leq 150 \times 10^9/\text{L}</math> (%)</b>        | 47 (12.4)        | 25 (9.5)      | 0.092                   | 35 (10.5)      | 14 (9.9)      | 0.022                   |
| <b>Creatinine <math>&gt; 120 \mu\text{mol/L}</math> (%)</b>           | 58 (15.3)        | 48 (18.3)     | 0.080                   | 49 (14.7)      | 20 (14.1)     | 0.018                   |

Blood test measurements are indicated as the presence or absence of a particular measurement above or below the stated threshold.

**Additional file 8: Baseline characteristics of the unmatched and matched cohorts in women**

| Characteristics                                                   | Unmatched cohort |               |                         | Matched cohort |               |                         |
|-------------------------------------------------------------------|------------------|---------------|-------------------------|----------------|---------------|-------------------------|
|                                                                   | No warfarin      | Warfarin      | Standardised difference | No warfarin    | Warfarin      | Standardised difference |
| <b>N</b>                                                          | 199              | 180           |                         | 164            | 90            |                         |
| <b>Age at baseline, years (mean (SD))</b>                         | 69.54 (11.86)    | 64.10 (14.44) | 0.412                   | 68.85 (11.80)  | 63.40 (14.65) | 0.409                   |
| <b>Type 2 diabetes (%)</b>                                        | 43 (21.6)        | 41 (22.8)     | 0.028                   | 34 (20.7)      | 18 (20.0)     | 0.018                   |
| <b>Hypertension (%)</b>                                           | 103 (51.8)       | 77 (42.8)     | 0.181                   | 75 (45.7)      | 28 (31.1)     | 0.304                   |
| <b>Ascites (%)</b>                                                | 41 (20.6)        | 45 (25.0)     | 0.105                   | 34 (20.7)      | 21 (23.3)     | 0.063                   |
| <b>Hepatic encephalopathy (%)</b>                                 | 6 (3.0)          | 10 (5.6)      | 0.126                   | 6 (3.7)        | 5 (5.6)       | 0.091                   |
| <b>Renal disease (%)</b>                                          | 28 (14.1)        | 24 (13.3)     | 0.021                   | 18 (11.0)      | 7 (7.8)       | 0.110                   |
| <b>Steatosis (%)</b>                                              | 27 (13.6)        | 22 (12.2)     | 0.040                   | 24 (14.6)      | 13 (14.4)     | 0.005                   |
| <b>Lipid regulating drugs (%)</b>                                 | 65 (32.7)        | 54 (30.0)     | 0.057                   | 54 (32.9)      | 27 (30.0)     | 0.063                   |
| <b>Hypertension treatment (%)</b>                                 | 81 (40.7)        | 73 (40.6)     | 0.003                   | 64 (39.0)      | 31 (34.4)     | 0.095                   |
| <b>Digoxin (%)</b>                                                | 41 (20.6)        | 28 (15.6)     | 0.131                   | 28 (17.1)      | 9 (10.0)      | 0.208                   |
| <b>Varices (%)</b>                                                | 27 (13.6)        | 30 (16.7)     | 0.087                   | 24 (14.6)      | 14 (15.6)     | 0.026                   |
| <b>Bilirubin <math>\geq</math> 34.2 <math>\mu</math>mol/L (%)</b> | 41 (20.6)        | 38 (21.1)     | 0.013                   | 30 (18.3)      | 12 (13.3)     | 0.136                   |
| <b>Albumin &lt; 35 g/L (%)</b>                                    | 5 (2.5)          | 6 (3.3)       | 0.049                   | 4 (2.4)        | 4 (4.4)       | 0.110                   |
| <b>INR <math>\geq</math> 1.7 (%)</b>                              | 3 (1.5)          | 89 (49.4)     | 1.317                   | 3 (1.8)        | 3 (3.3)       | 0.095                   |
| <b>Alanine aminotransferase <math>\geq</math> 35 U/L (%)</b>      | 87 (43.7)        | 77 (42.8)     | 0.019                   | 68 (41.5)      | 34 (37.8)     | 0.075                   |
| <b>Aspartate transaminase <math>\geq</math> 40 U/L (%)</b>        | 41 (20.6)        | 35 (19.4)     | 0.029                   | 29 (17.7)      | 14 (15.6)     | 0.057                   |
| <b>BMI <math>\geq</math> 30 kg/m<sup>2</sup> (%)</b>              | 85 (42.7)        | 67 (37.2)     | 0.11                    | 69 (42.1)      | 31 (34.4)     | 0.157                   |
| <b>Gamma-glutamyltransferase <math>\geq</math> 48 U/L (%)</b>     | 75 (37.7)        | 73 (40.6)     | 0.059                   | 57 (34.8)      | 24 (26.7)     | 0.176                   |
| <b>Alkaline phosphatase <math>\geq</math> 140 U/L (%)</b>         | 107 (53.8)       | 102 (56.7)    | 0.058                   | 80 (48.8)      | 38 (42.2)     | 0.132                   |
| <b>Platelet <math>\leq</math> 150 <math>10^9</math>/L (%)</b>     | 20 (10.1)        | 20 (11.1)     | 0.034                   | 18 (11.0)      | 10 (11.1)     | 0.004                   |
| <b>Creatinine &gt; 120 <math>\mu</math>mol/L (%)</b>              | 36 (18.1)        | 18 (10.0)     | 0.234                   | 13 (7.9)       | 4 (4.4)       | 0.145                   |

Blood test measurements are indicated as the presence or absence of a particular measurement above or below the stated threshold.



**Additional file 9: Baseline characteristics of the unmatched and matched cohorts in individuals with INR < 1.7**

| Characteristics                               | Unmatched cohort |               |                         | Matched cohort |               |                         |
|-----------------------------------------------|------------------|---------------|-------------------------|----------------|---------------|-------------------------|
|                                               | No warfarin      | Warfarin      | Standardised difference | No warfarin    | Warfarin      | Standardised difference |
| <b>N</b>                                      | 568              | 226           |                         | 471            | 217           |                         |
| <b>Gender, women (%)</b>                      | 196 (34.5)       | 91 (40.3)     | 0.119                   | 173 (36.7)     | 85 (39.2)     | 0.050                   |
| <b>Age at baseline, years (mean (SD))</b>     | 65.74 (12.47)    | 61.20 (13.62) | 0.348                   | 64.64 (12.43)  | 61.90 (13.33) | 0.213                   |
| <b>Type 2 diabetes (%)</b>                    | 133 (23.4)       | 45 (19.9)     | 0.085                   | 111 (23.6)     | 43 (19.8)     | 0.091                   |
| <b>Hypertension (%)</b>                       | 251 (44.2)       | 76 (33.6)     | 0.218                   | 198 (42.0)     | 76 (35.0)     | 0.145                   |
| <b>Ascites (%)</b>                            | 137 (24.1)       | 63 (27.9)     | 0.086                   | 117 (24.8)     | 60 (27.6)     | 0.064                   |
| <b>Hepatic encephalopathy (%)</b>             | 26 (4.6)         | 15 (6.6)      | 0.090                   | 24 (5.1)       | 12 (5.5)      | 0.019                   |
| <b>Renal disease (%)</b>                      | 74 (13.0)        | 20 (8.8)      | 0.134                   | 54 (11.5)      | 19 (8.8)      | 0.090                   |
| <b>Steatosis (%)</b>                          | 62 (10.9)        | 25 (11.1)     | 0.005                   | 57 (12.1)      | 24 (11.1)     | 0.033                   |
| <b>Lipid regulating drugs (%)</b>             | 156 (27.5)       | 58 (25.7)     | 0.041                   | 128 (27.2)     | 57 (26.3)     | 0.021                   |
| <b>Hypertension treatment (%)</b>             | 232 (40.8)       | 88 (38.9)     | 0.039                   | 196 (41.6)     | 84 (38.7)     | 0.059                   |
| <b>Digoxin (%)</b>                            | 104 (18.3)       | 26 (11.5)     | 0.192                   | 76 (16.1)      | 25 (11.5)     | 0.134                   |
| <b>Varices (%)</b>                            | 89 (15.7)        | 32 (14.2)     | 0.042                   | 66 (14.0)      | 32 (14.7)     | 0.021                   |
| <b>Bilirubin ≥ 34.2 µmol/L (%)</b>            | 124 (21.8)       | 41 (18.1)     | 0.092                   | 93 (19.7)      | 39 (18.0)     | 0.045                   |
| <b>Albumin &lt; 35 g/L (%)</b>                | 17 (3.0)         | 11 (4.9)      | 0.097                   | 17 (3.6)       | 10 (4.6)      | 0.050                   |
| <b>Alanine aminotransferase ≥ 35 U/L (%)</b>  | 240 (42.3)       | 78 (34.5)     | 0.160                   | 187 (39.7)     | 76 (35.0)     | 0.097                   |
| <b>Aspartate transaminase ≥ 40 U/L (%)</b>    | 115 (20.2)       | 39 (17.3)     | 0.077                   | 90 (19.1)      | 37 (17.1)     | 0.053                   |
| <b>BMI ≥ 30 kg/m<sup>2</sup> (%)</b>          | 223 (39.3)       | 78 (34.5)     | 0.10                    | 180 (38.2)     | 76 (35.0)     | 0.066                   |
| <b>Gamma-glutamyltransferase ≥ 48 U/L (%)</b> | 258 (45.4)       | 67 (29.6)     | 0.330                   | 186 (39.5)     | 67 (30.9)     | 0.181                   |
| <b>Alkaline phosphatase ≥ 140 U/L (%)</b>     | 251 (44.2)       | 98 (43.4)     | 0.017                   | 204 (43.3)     | 93 (42.9)     | 0.009                   |
| <b>Platelet ≤ 150 10<sup>9</sup>/L (%)</b>    | 64 (11.3)        | 24 (10.6)     | 0.021                   | 54 (11.5)      | 22 (10.1)     | 0.043                   |
| <b>Creatinine &gt; 120 µmol/L (%)</b>         | 90 (15.8)        | 22 (9.7)      | 0.184                   | 72 (15.3)      | 22 (10.1)     | 0.155                   |

Blood test measurements are indicated as the presence or absence of a particular measurement above or below the stated threshold.

## Additional file 10. Summary of survey responses.

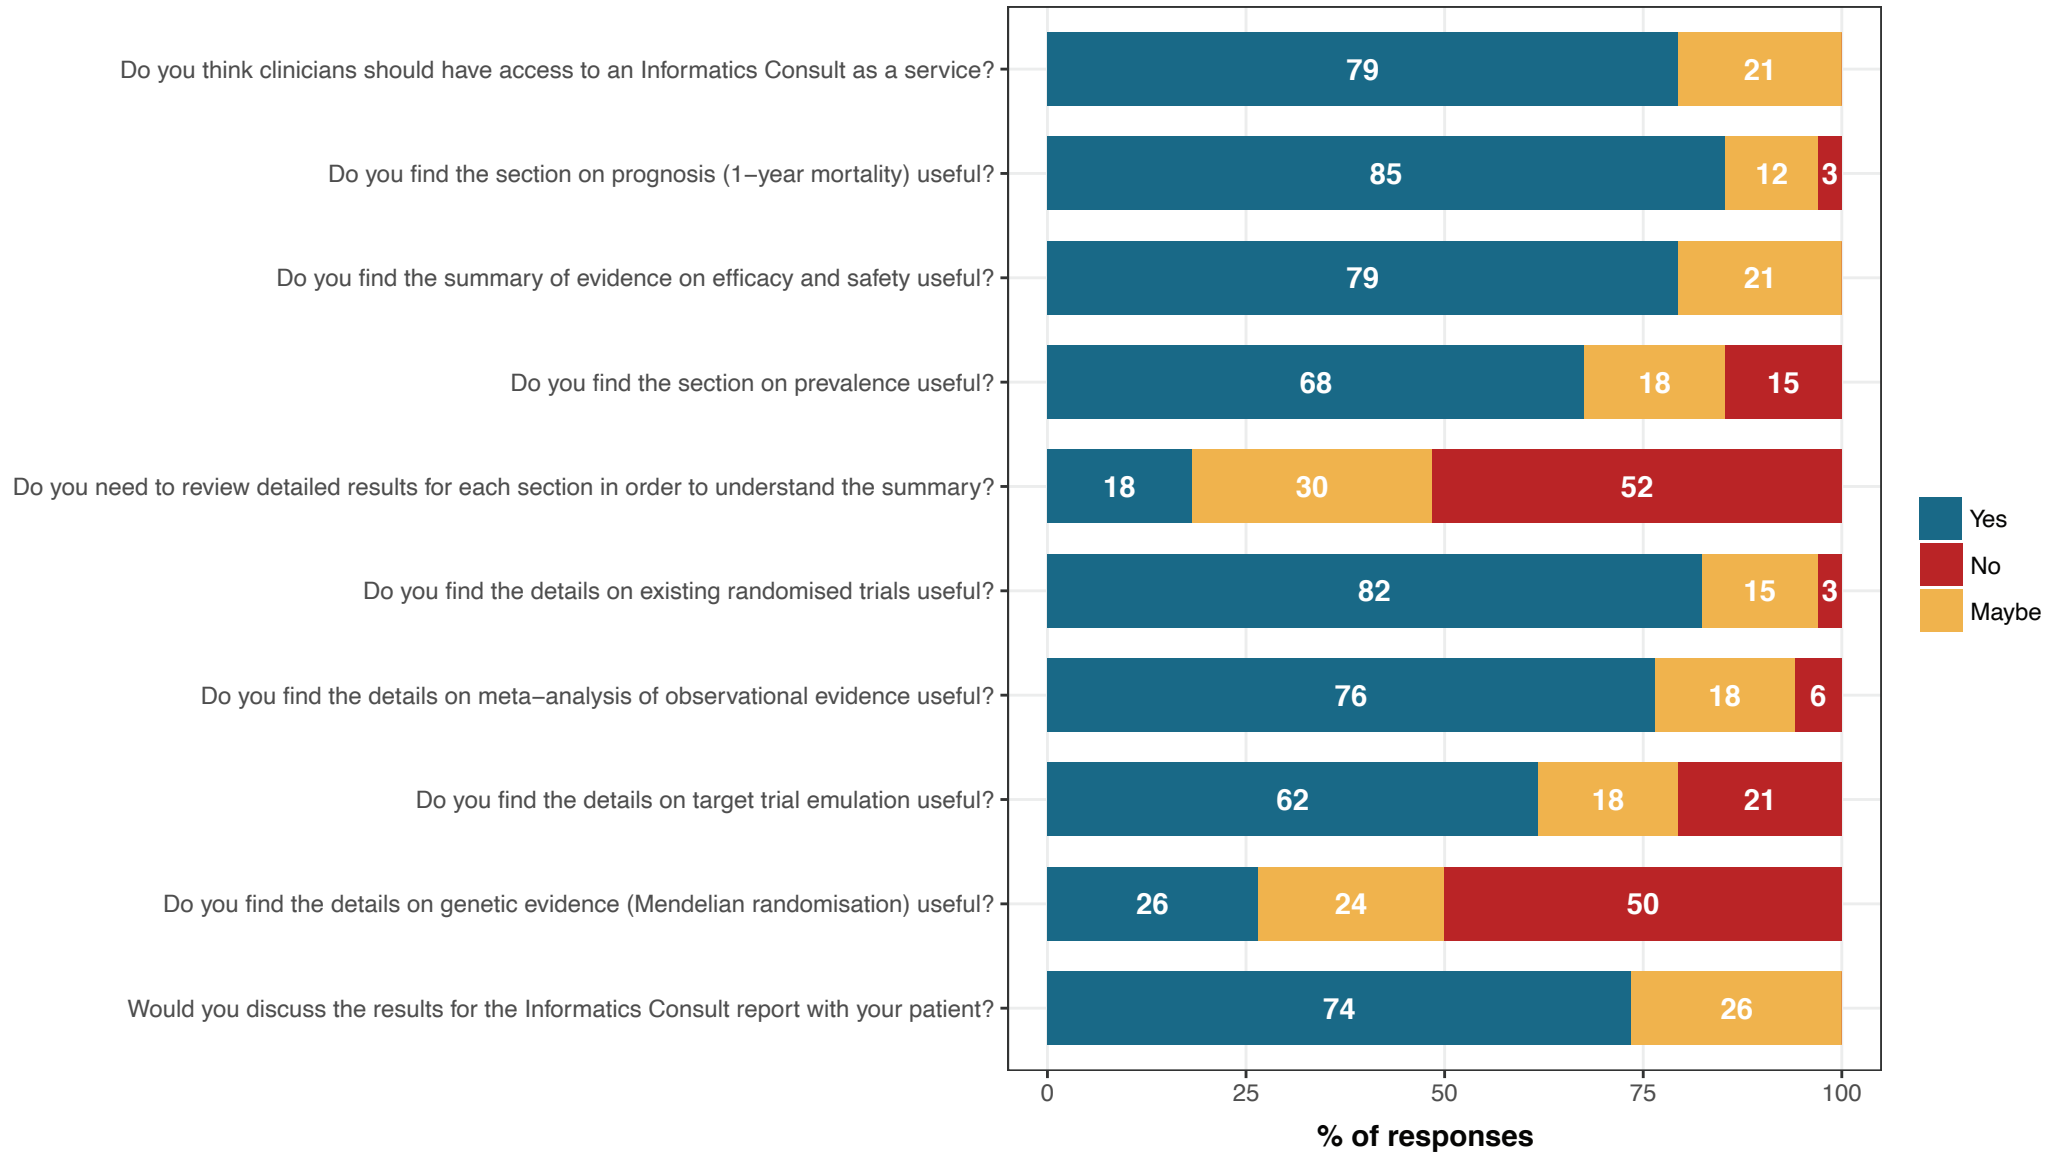

**Additional file 11. Survey questionnaire.**

1. Do you think clinicians should have access to an Informatics Consult as a service?  
Yes | No | Maybe
  
2. Do you find the section on prognosis (1-year mortality) useful?  
Yes | No | Maybe
  
3. Do you find the summary of evidence on efficacy and safety useful?  
Yes | No | Maybe
  
4. Do you find the section on prevalence useful?  
Yes | No | Maybe
  
5. Do you need to review detailed results for each section in order to understand the summary?  
Yes | No | Maybe
  
6. Do you find the details on existing randomised trials useful?  
Yes | No | Maybe
  
7. Do you find the details on meta-analysis of observational evidence useful?  
Yes | No | Maybe
  
8. Do you find the details on target trial emulation useful?  
Yes | No | Maybe
  
9. Do you find the details on genetic evidence (Mendelian randomisation) useful?  
Yes | No | Maybe
  
10. Would you discuss the results for the Informatics Consult report with your patient?  
Yes | No | Maybe
